# Supplementary material for: Serum brain-derived neurotrophic factor, micronutrient status, and inflammatory cytokines in type 2 diabetes with nephropathy: a case–control analysis
Source: PeerJ. 2025 Oct 20;13:e20086. doi: 10.7717/peerj.20086 (PMC12548638; doi:10.7717/peerj.20086)
Supplement: Supplemental Information 1 [file peerj-13-20086-s001.xlsx]

## Sheet: Data
	0: Control	1: Female
	1: DM	2: Male
	2: DM+nephropathy
Patients No	Groups	Sex	Age	BMI	BDNF ng/ml	Fasting plasma glucose mg/dl	Hba1c	Total cholestrol mg/dl	TG mg/dl	HDL mg/dl	B.Urea	S.Cr	S.Folic acid ng/mL	B12 mcg/L	S. Ca	S.Zn µmol/L	Vit. D (ng/mL)	IL-6 pg/mL	IL-12 pg/ml	SBP(mmHg)	DBP(mmHg)
1	0	1	52	25.8	42	82	5.4	170	165	47	25	0.9	11	33	8.5	89	25	10.1	8.8	11	7
2	0	2	55	27.9	45	84	5.1	152	183	40	29	0.7	16	37	7.4	73	28	8.4	3.2	12	7
3	0	2	60	25.8	41	80	5.7	210	172	33	33	0.8	13	31	9.9	71	32	9.6	6.3	13	7
4	0	1	57	26.3	53	78	6.1	159	164	48	31	0.7	18	36	9.3	80	26	10.2	8.1	12	6
5	0	2	47	22.5	58	81	5.4	175	165	43	37	0.9	16	34	8.6	95	14	12.3	7.9	13	7
6	0	1	53	22.8	43	89	5.7	160	153	49	32	0.9	17	32	7.8	92	23	8.4	8.3	12	8
7	0	1	59	26.2	39	96	5.9	167	168	44	36	0.7	14	37	8.3	76	16	7.3	6.2	11	7
8	0	1	56	24.2	44	85	4.7	186	194	46	31	0.9	11	34	9.2	93	7	9.1	4.5	12	6
9	0	2	68	23	27	82	5.9	177	155	52	41	0.6	16	46	7.5	86	11	7.4	6.2	12	6
10	0	2	65	28.9	33	85	5.8	158	163	46	31	0.9	12	35	9.2	89	26	7.2	7.4	13	7
11	0	1	61	22.4	37	84	5.3	198	169	43	39	0.9	16	37	8.7	76	12	9.3	7.2	13	7
12	0	2	47	26.3	37	85	5.3	217	181	48	37	0.7	15	31	8.9	81	18	6.1	8.3	12	7
13	0	2	55	27.7	46	86	5.6	211	175	41	37	0.8	16	36	9.4	94	27	6.5	9.1	12	7
14	0	1	58	24.1	38	83	5.4	193	175	42	36	0.7	11	34	6.8	126	23	4.3	7.3	13	8
15	0	1	62	25.5	34	85	5.9	189	182	35	35	0.8	16	44	8.4	93	17	12.1	6.7	12	6
16	0	2	62	23	38	88	5.8	173	162	38	32	0.8	19	37	9.2	96	29	14.8	7.2	13	6
17	0	2	58	28.8	53	87	5.4	188	187	43	37	0.9	14	34	8.1	97	27	10.5	8.1	12	8
18	0	2	57	27.9	41	81	5.4	185	169	41	30	0.7	13	46	8.6	91	21	7.3	9.3	13	8
19	0	1	59	27.3	35	89	5.2	193	184	49	32	0.8	8	48	7	114	26	12.6	7.3	12	7
20	0	1	55	23.6	44	91	4.7	169	163	52	31	0.8	13	41	11.3	93	29	17.1	7.2	13	7
21	0	1	60	23.1	42	94	5.9	223	158	36	37	0.9	19	36	8.8	89	27	4.6	8.1	12	6
22	0	2	58	22.8	41	81	5.6	186	164	52	32	0.8	9	42	9.2	86	34	4.8	5.3	13	8
23	0	1	58	27.7	45	80	5.7	173	160	43	34	0.7	11	44	9.3	109	27	8.4	9.1	12	6
24	0	2	56	26.9	47	78	5.7	192	175	45	33	0.8	9	47	7.8	113	15	9.2	2.7	12	8
25	0	1	61	29	48	80	5.3	189	182	43	32	0.7	17	42	9.2	127	18	6.3	8.1	13	6
26	0	2	58	23	48	84	5.2	179	179	39	34	0.6	11	49	8.3	107	23	9.2	7.7	13	7
27	0	1	57	22.1	41	84	5.6	164	175	37	31	0.7	8	36	8.5	88	27	5.6	7.2	13	8
28	0	2	60	26.1	46	95	5.7	173	182	47	36	0.6	19	46	8.2	94	20	7.3	8.1	12	6
29	0	1	55	24	45	83	5.5	192	187	43	37	0.7	11	43	7.9	96	31	6.9	9.5	13	7
30	0	2	51	26.4	41	86	5.4	184	164	52	32	0.9	13	37	7.3	87	25	8.4	8.6	12	7
31	0	1	57	28.4	33	81	5.4	172	187	34	38	0.8	17	32	7.6	91	27	9.1	6.4	12	6
32	0	1	52	22.3	42	82	5.4	170	165	47	25	0.9	11	33	8.5	89	25	10.1	8.8	11	6
33	0	2	55	25	45	84	5.1	152	183	40	29	0.7	16	37	7.4	73	28	8.4	3.2	12	7
34	0	2	60	27.7	41	80	5.7	210	172	33	33	0.8	13	31	9.9	71	32	9.6	6.3	13	6
35	0	1	57	28.1	53	78	6.1	159	164	48	31	0.7	18	36	9.3	80	26	10.2	8.1	12	6
36	0	2	47	26.4	58	81	5.4	175	165	43	37	0.9	16	34	8.6	95	14	12.3	7.9	13	8
37	0	1	53	22.7	43	89	5.7	160	153	49	32	0.9	17	32	7.8	92	23	8.4	8.3	12	7
38	0	1	59	25.6	39	96	5.9	167	168	44	36	0.7	14	37	8.3	76	16	7.3	6.2	11	7
39	0	1	56	24.5	44	85	4.7	186	194	46	31	0.9	11	34	9.2	93	7	9.1	4.5	12	8
40	0	2	68	24.1	27	82	5.9	177	155	52	41	0.6	16	46	7.5	86	11	7.4	6.2	12	8
41	0	2	65	26.4	33	85	5.8	158	163	46	31	0.9	12	35	9.2	89	26	7.2	7.4	13	7
42	0	1	61	26.1	37	84	5.3	198	169	43	39	0.9	16	37	8.7	76	12	9.3	7.2	13	7
43	0	2	47	23.2	37	85	5.3	217	181	48	37	0.7	15	31	8.9	81	18	6.1	8.3	12	7
44	0	2	55	25.9	46	86	5.6	211	175	41	37	0.8	16	36	9.4	94	27	6.5	9.1	12	8
45	0	1	58	24.8	38	83	5.4	193	175	42	36	0.7	11	34	6.8	126	23	4.3	7.3	13	6
46	0	1	62	23.4	34	85	5.9	189	182	35	35	0.8	16	44	8.4	93	17	12.1	6.7	12	7
47	0	2	62	26.5	38	88	5.8	173	162	38	32	0.8	19	37	9.2	96	29	14.8	7.2	13	7
48	0	2	58	26.2	53	87	5.4	188	187	43	37	0.9	14	34	8.1	97	27	10.5	8.1	12	7
49	0	2	57	22.1	41	81	5.4	185	169	41	30	0.7	13	46	8.6	91	21	7.3	9.3	13	6
50	0	1	59	22	35	89	5.2	193	184	49	32	0.8	8	48	7	114	26	12.6	7.3	12	7
51	0	1	55	23.4	44	91	4.7	169	163	52	31	0.8	13	41	11.3	93	29	17.1	7.2	13	6
52	0	1	60	28.8	42	94	5.9	223	158	36	37	0.9	19	36	8.8	89	27	4.6	8.1	12	7
53	0	2	58	22.6	41	81	5.6	186	164	52	32	0.8	9	42	9.2	86	34	4.8	5.3	13	7
54	0	1	58	25.8	45	80	5.7	173	160	43	34	0.7	11	44	9.3	109	27	8.4	9.1	12	7
55	0	2	56	27.7	47	78	5.7	192	175	45	33	0.8	9	47	7.8	113	15	9.2	2.7	12	7
56	0	1	61	26.1	48	80	5.3	189	182	43	32	0.7	17	42	9.2	127	18	6.3	8.1	13	7
57	0	2	58	28.2	48	84	5.2	179	179	39	34	0.6	11	49	8.3	107	23	9.2	7.7	13	6
58	0	1	57	25.2	41	84	5.6	164	175	37	31	0.7	8	36	8.5	88	27	5.6	7.2	13	6
59	0	2	60	22.9	46	95	5.7	173	182	47	36	0.6	19	46	8.2	94	20	7.3	8.1	12	8
60	0	1	55	22.2	45	83	5.5	192	187	43	37	0.7	11	43	7.9	96	31	6.9	9.5	13	8
61	0	2	51	26.2	41	86	5.4	184	164	52	32	0.9	13	37	7.3	87	25	8.4	8.6	12	7
62	0	1	57	26.3	33	81	5.4	172	187	34	38	0.8	17	32	7.6	91	27	9.1	6.4	12	6
63	1	2	55	25.6	22	103	8.2	190	236	32	28	0.9	11	38	9.3	93	13	16.3	16.3	13	8
64	1	1	67	29	16	124	8.1	160	153	41	26	0.8	16	28	9.4	84	17	11.7	8.2	12	9
65	1	2	54	22.3	36	108	8.4	250	177	37	33	0.6	19	41	9.1	95	8	12.1	3.7	15	10
66	1	2	58	26	46	87	8.6	170	212	28	37	0.7	14	39	9.6	88	14	14.6	4.6	12	8
67	1	1	50	27.1	33	104	9.6	240	197	46	31	0.9	13	37	7.3	94	23	10.2	7.4	10	9
68	1	2	61	28.8	37	118	8.2	168	147	32	38	0.9	8	44	8.2	80	6	11.8	10.6	11	5
69	1	1	48	26.2	31	115	8.6	246	193	36	23	0.6	13	41	8.5	76	29	7.6	11.8	12	9
70	1	1	52	25.6	28	110	7.4	166	162	42	29	0.8	19	39	8.5	92	24	12.6		16	8
71	1	1	53	24.7	35	125	7.5	239	184	41	41	0.7	9	46	7.4	78	16	11.7	9.3	12	9
72	1	1	62	23.2	37	144	8.5	181	143	47	35	0.8	11	45	9.9	81	11	17.3	8.4	13	8
73	1	2	67	27.1	41	105	7.1	200	194	53	37	0.9	9	44	9.3	89	7	10.2	7.6	15	9
74	1	1	65	28.2	36	98	7.4	199	154	42	32	0.9	17	37	8.6	83	23	13.1	16.3	10	7
75	1	2	60	22.8	23	121	7.6	187	163	39	39	0.8	11	31	7.8	91	26	15.4	9.1	12	8
76	1	1	54	28.2	45	104	7.7	265	183	40	37	0.6	8	32	8.3	89	17	17.3	11.2	12	8
77	1	1	57	24.2	42	99	7.6	245	179	42	35	0.9	19	36	9.2	73	19	12.6	8.4	13	8
78	1	2	54	27.3	43	87	7.2	189	192	41	27	0.7	18	34	7.5	71	13	10.6	6.4	12	8
79	1	1	57	25.8	41	136	8.5	207	217	48	24	0.8	18	37	9.3	80	24	9.7	10.7	15	9
80	1	1	64	24.3	46	92	8.2	203	221	46	28	0.7	14	34	12.7	95	28	15.3	16.3	14	8
81	1	1	52	24	37	105	8.9	150	163	39	29	0.9	11	41	8.9	112	22	12.2	5.3	12	8
82	1	2	54	23.6	31	88	7.1	202	180	38	37	0.9	15	42	6.4	76	23	10.6	16.8	13	8
83	1	1	57	27.8	32	104	7.5	198	217	35	28	0.7	12	46	6.8	93	21	9.2	14.3	14	8
84	1	2	53	25.2	30	118	7.4	206	191	37	29	0.9	11	31	9.4	86	26	12.9	7.3	12	8
85	1	1	52	27.3	34	124	7.3	166	173	38	31	0.6	14	33	9.2	89	21	16.4	8.2	12	8
86	1	2	65	24.9	36	123	7.6	210	154	43	36	0.9	12	37	8.1	76	27	14.4	9.1	15	10
87	1	1	57	28.4	31	127	7.4	212	168	47	32	0.9	12	31	8.6	81	33	13.2	4.2	12	8
88	1	1	66	22.8	43	154	7.6	161	161	41	38	0.7	16	36	8.2	94	29	16.2	8.6	13	8
89	1	2	68	25.4	31	176	7.2	269	184	43	33	0.8	13	34	7.6	79	12	11.6	11.6	12	8
90	1	2	52	24.5	30	132	6.9	187	162	41	25	0.7	15	32	7.7	93	18	12.6	7.5	14	8
91	1	2	54	23.5	26	141	8.2	267	174	49	27	0.8	18	37	6.1	107	20	8.4	7.6	12	9
92	1	1	58	26.3	25	113	7	197	179	38	27	0.8	16	34	8.7	97	21	9.1	8.2	13	8
93	1	2	71	26.7	33	119	7.4	178	183	43	36	0.9	17	46	9.3	91	25	13.6	11.4	12	8
94	1	2	55	22.5	22	103	8.2	190	236	32	28	0.9	11	38	9.3	93	13	16.3	16.3	13	8
95	1	1	67	27.7	16	124	8.1	160	153	41	26	0.8	16	28	9.4	84	17	11.7	8.2	12	9
96	1	2	54	28.3	36	108	8.4	250	177	37	33	0.6	19	41	9.1	95	8	12.1	3.7	15	10
97	1	2	58	24	46	87	8.6	170	212	28	37	0.7	14	39	9.6	88	14	14.6	4.6	12	8
98	1	1	50	24.2	33	104	9.6	240	197	46	31	0.9	13	37	7.3	94	23	10.2	7.4	10	9
99	1	2	61	27.5	37	118	8.2	168	147	32	38	0.9	8	44	8.2	80	6	11.8	10.6	11	5
100	1	1	48	26.6	31	115	8.6	246	193	36	23	0.6	13	41	8.5	76	29	7.6	11.8	12	9
101	1	1	52	27.8	28	110	7.4	166	162	42	29	0.8	19	39	8.5	92	24	12.6		16	8
102	1	1	53	28.5	35	125	7.5	239	184	41	41	0.7	9	46	7.4	78	16	11.7	9.3	12	9
103	1	1	62	27.7	37	144	8.5	181	143	47	35	0.8	11	45	9.9	81	11	17.3	8.4	13	8
104	1	2	67	25.2	41	105	7.1	200	194	53	37	0.9	9	44	9.3	89	7	10.2	7.6	15	9
105	1	1	65	23.4	36	98	7.4	199	154	42	32	0.9	17	37	8.6	83	23	13.1	16.3	10	7
106	1	2	60	27.8	23	121	7.6	187	163	39	39	0.8	11	31	7.8	91	26	15.4	9.1	12	8
107	1	1	54	22.3	45	104	7.7	265	183	40	37	0.6	8	32	8.3	89	17	17.3	11.2	12	8
108	1	1	57	23.2	42	99	7.6	245	179	42	35	0.9	19	36	9.2	73	19	12.6	8.4	13	8
109	1	2	54	24	43	87	7.2	189	192	41	27	0.7	18	34	7.5	71	13	10.6	6.4	12	8
110	1	1	57	23.9	41	136	8.5	207	217	48	24	0.8	18	37	9.3	80	24	9.7	10.7	15	9
111	1	1	64	27.5	46	92	8.2	203	221	46	28	0.7	14	34	12.7	95	28	15.3	16.3	14	8
112	1	1	52	22	37	105	8.9	150	163	39	29	0.9	11	41	8.9	112	22	12.2	5.3	12	8
113	1	2	54	24.2	31	88	7.1	202	180	38	37	0.9	15	42	6.4	76	23	10.6	16.8	13	8
114	1	1	57	27.3	32	104	7.5	198	217	35	28	0.7	12	46	6.8	93	21	9.2	14.3	14	8
115	1	2	53	27.5	30	118	7.4	206	191	37	29	0.9	11	31	9.4	86	26	12.9	7.3	12	8
116	1	1	52	26.6	34	124	7.3	166	173	38	31	0.6	14	33	9.2	89	21	16.4	8.2	12	8
117	1	2	65	28.2	36	123	7.6	210	154	43	36	0.9	12	37	8.1	76	27	14.4	9.1	15	10
118	1	1	57	28.5	31	127	7.4	212	168	47	32	0.9	12	31	8.6	81	33	13.2	4.2	12	8
119	1	1	66	25.6	43	154	7.6	161	161	41	38	0.7	16	36	8.2	94	29	16.2	8.6	13	8
120	1	2	68	27.5	31	176	7.2	269	184	43	33	0.8	13	34	7.6	79	12	11.6	11.6	12	8
121	1	2	52	28.2	30	132	6.9	187	162	41	25	0.7	15	32	7.7	93	18	12.6	7.5	14	8
122	1	2	54	25.5	26	141	8.2	267	174	49	27	0.8	18	37	6.1	107	20	8.4	7.6	12	9
123	1	1	58	24.7	25	113	7	197	179	38	27	0.8	16	34	8.7	97	21	9.1	8.2	13	8
124	1	2	71	24	33	119	7.4	178	183	43	36	0.9	17	46	9.3	91	25	13.6	11.4	12	8
125	2	2	56	23.9	12	103	7.61	255	164	42	75	1.6	4	21	8.8	66	32	12.5	23	14	9
126	2	2	60	24.1	23	116	9.33	312	143	41	56	2.1	5	33	8.7	72	26	17	11	15	10
127	2	1	52	27.3	31	109	8.2	196	167	44	63	1.7	2	26	9.3	73	16	17.6	14	14	8
128	2	2	66	27.9	36	122	7.5	281	314	46	55	1.9	7	32	11.2	90	7	13.5	5	17	11
129	2	1	61	27.6	18	98	7.9	140	172	47	43	1.7	5	18	7.2	81	13	18.2	3	18	10
130	2	1	61	27.8	26	114	8.1	344	271	41	57	1.9	8	27	7.6	83	8	10.3	6	16	12
131	2	1	64	26.7	44	103	9.3	214	203	48	56	2.2	9	22	8.4	79	16	13.2	8	15	8
132	2	2	59	26.9	15	105	8.4	170	187	46	43	1.7	11	29	8.6	61	11	14.7	13	17	9
133	2	2	56	27.4	17	107	8.4	345	265	31	73	2	6	37	9.2	105	15	12.6	9.8	15	10
134	2	1	54	25.2	26	94	7.2	277	302	37	61	2.4	9	21	6.5	94	12	17.5	6.3	17	8
135	2	2	52	25.5	32	146	11.9	321	172	42	40	2.1	4	27	7.3	87	17	14.3	8.2	19	10
136	2	1	66	28.2	35	136	10.3	199	193	38	43	1.6	13	16	8.6	86	22	18.7	13.7	20	18
137	2	2	68	28.5	31	145	11.2	289	227	37	62	2.4	8	14	8.9	93	22	11.3	14	17	12
138	2	1	62	25.3	32	122	8.6	180	174	44	69	1.9	3	28	7.3	84	13	18.6	9.4	14	10
139	2	1	59	24.6	27	102	8.4	366	183	47	51	1.5	19	32	9.7	95	16	16.3	12.6	19	9
140	2	1	55	28.3	21	118	9.3	219	231	41	54	1.7	9	25	10.6	88	22	17.2	14.8	16	9
141	2	1	58	25.6	25	105	9.1	199	171	38	56	1.7	11	24	11	94	24	13.3	23.4	14	10
142	2	2	51	24.4	28	117	8.4	215	186	46	48	1.8	9	27	9.6	80	16	17.6	6.3	13	8
143	2	1	56	22.6	26	123	12.5	322	232	32	55	1.7	17	26	6.8	76	8	15.4	7.4	17	10
144	2	2	59	26.3	22	126	10.4	170	167	37	54	1.8	11	27	6.3	92	12	13.9	11.6	18	11
145	2	2	57	22.3	23	204	12.3	200	187	46	48	2.1	8	34	7.6	78	17	15.2	16.3	15	9
146	2	1	58	22.4	13	117	8.9	307	193	44	41	1.3	9	19	8.5	81	11	11.3	7.6	17	11
147	2	2	60	25.7	40	132	10.4	158	162	41	60	1.9	18	32	7.4	89	21	15.2	13.2	18	10
148	2	2	59	25.1	36	124	8.2	205	184	45	53	1.7	8	29	9.9	83	32	16.1	19.4	12	7
149	2	1	59	24	31	154	8.4	188	143	45	51	2.1	5	33	9.3	91	9	12.4	6.4	16	10
150	2	1	60	28.1	32	136	8.5	307	194	44	64	1.8	9	32	8.6	89	11	11.8	10.7	17	12
151	2	1	54	24.5	36	123	8.2	209	183	49	72	2.3	13	27	7.8	73	13	16.7	16.3	18	12
152	2	1	61	22.9	28	136	8.4	190	175	47	50	1.9	10	21	8.3	71	21	18.5	5.3	16	10
153	2	2	63	24.9	20	103	8.6	303	263	41	49	1.4	16	29	9.2	80	17	19.3	16.8	17	11
154	2	1	59	25.9	31	107	9.5	208	252	35	54	1.5	5	25	9.6	95	16	15.8	14.3	17	11
155	2	2	56	24.8	12	103	7.61	255	164	42	75	1.6	4	21	8.8	66	32	12.5	23	14	9
156	2	2	60	23.1	23	116	9.33	312	143	41	56	2.1	5	33	8.7	72	26	17	11	15	10
157	2	1	52	23	31	109	8.2	196	167	44	63	1.7	2	26	9.3	73	16	17.6	14	14	8
158	2	2	66	24.6	36	122	7.5	281	314	46	55	1.9	7	32	11.2	90	7	13.5	5	17	11
159	2	1	61	23.5	18	98	7.9	140	172	47	43	1.7	5	18	7.2	81	13	18.2	3	18	10
160	2	1	61	23.6	26	114	8.1	344	271	41	57	1.9	8	27	7.6	83	8	10.3	6	16	12
161	2	1	64	23.6	44	103	9.3	214	203	48	56	2.2	9	22	8.4	79	16	13.2	8	15	8
162	2	2	59	28.2	15	105	8.4	170	187	46	43	1.7	11	29	8.6	61	11	14.7	13	17	9
163	2	2	56	26.6	17	107	8.4	345	265	31	73	2	6	37	9.2	105	15	12.6	9.8	15	10
164	2	1	54	23	26	94	7.2	277	302	37	61	2.4	9	21	6.5	94	12	17.5	6.3	17	8
165	2	2	52	23.1	32	146	11.9	321	172	42	40	2.1	4	27	7.3	87	17	14.3	8.2	19	10
166	2	1	66	28.4	35	136	10.3	199	193	38	43	1.6	13	16	8.6	86	22	18.7	13.7	20	18
167	2	2	68	27.4	31	145	11.2	289	227	37	62	2.4	8	14	8.9	93	22	11.3	14	17	12
168	2	1	62	29	32	122	8.6	180	174	44	69	1.9	3	28	7.3	84	13	18.6	9.4	14	10
169	2	1	59	26.1	27	102	8.4	366	183	47	51	1.5	19	32	9.7	95	16	16.3	12.6	19	9
170	2	1	55	25.5	21	118	9.3	219	231	41	54	1.7	9	25	10.6	88	22	17.2	14.8	16	9
171	2	1	58	23.2	25	105	9.1	199	171	38	56	1.7	11	24	11	94	24	13.3	23.4	14	10
172	2	2	51	24.8	28	117	8.4	215	186	46	48	1.8	9	27	9.6	80	16	17.6	6.3	13	8
173	2	1	56	28.5	26	123	12.5	322	232	32	55	1.7	17	26	6.8	76	8	15.4	7.4	17	10
174	2	2	59	28.3	22	126	10.4	170	167	37	54	1.8	11	27	6.3	92	12	13.9	11.6	18	11
175	2	2	57	22.2	23	204	12.3	200	187	46	48	2.1	8	34	7.6	78	17	15.2	16.3	15	9
176	2	1	58	22.3	13	117	8.9	307	193	44	41	1.3	9	19	8.5	81	11	11.3	7.6	17	11
177	2	2	60	22.4	40	132	10.4	158	162	41	60	1.9	18	32	7.4	89	21	15.2	13.2	18	10
178	2	2	59	28.1	36	124	8.2	205	184	45	53	1.7	8	29	9.9	83	32	16.1	19.4	12	7
179	2	1	59	24.7	31	154	8.4	188	143	45	51	2.1	5	33	9.3	91	9	12.4	6.4	16	10
180	2	1	60	28.2	32	136	8.5	307	194	44	64	1.8	9	32	8.6	89	11	11.8	10.7	17	12
181	2	1	54	25.2	36	123	8.2	209	183	49	72	2.3	13	27	7.8	73	13	16.7	16.3	18	12
182	2	1	61	26.8	28	136	8.4	190	175	47	50	1.9	10	21	8.3	71	21	18.5	5.3	16	10
183	2	2	63	25.5	20	103	8.6	303	263	41	49	1.4	16	29	9.2	80	17	19.3	16.8	17	11
184	2	1	59	22.1	31	107	9.5	208	252	35	54	1.5	5	25	9.6	95	16	15.8	14.3	17	11
